# Supplementary material for: Conducting perception research over the internet: a tutorial review
Source: PeerJ. 2015 Jul 23;3:e1058. doi: 10.7717/peerj.1058 (PMC4517966; doi:10.7717/peerj.1058)
Supplement: Data S1 [file peerj-03-1058-s001.xlsx]

## Sheet: data
hits	expt	ident	expt
		5	47	:SUM
		100	100	:OUT OF
155955	yes	0	1		columnHeader	question
700	no	0	0		hits	how many Hits do you think you have done in total?
3800	yes	0	1		ident	did your google search results contain information that revealed your name or IP address?
130000	yes	0	1		expt	did your google search of your Worker ID find links to 'raw data' (answers you gave) from past studies you have taken part in?
14457	no	0	0
500	yes	0	1
6	no	0	0
37000	yes	0	1
160000	yes	0	1
2800	no	0	0
1296	no	0	0
139517	yes	0	1
31000	yes	0	1
2500	no	0	0
163159	no	0	0
292	no	0	0
195000	yes	1	1
55000	no	0	0
72176	yes	0	1
61000	yes	0	1
37204	no	0	0
210000	no	0	0
221000	yes	0	1
6000	yes	0	1
1725	no	0	0
31000	yes	0	1
7500	yes	0	1
61000	no	0	0
25303	yes	0	1
14000	yes	0	1
9040	no	0	0
70000	no	0	0
780	no	0	0
2000	yes	0	1
1902	no	0	0
164226	yes	0	1
3383	no	0	0
1000	no	0	0
2089	no	0	0
8000	no	1	0
7794	no	0	0
243434	no	0	0
30000	no	0	0
15610	no	0	0
389	no	0	0
60000	no	0	0
250000	yes	0	1
28000	yes	0	1
7000	no	0	0
101456	no	0	0
5324	no	0	0
25000	yes	0	1
1285	no	1	0
7446	yes	0	1
15000	yes	0	1
1394	no	0	0
707	no	0	0
17794	yes	0	1
3000	no	0	0
1772	no	0	0
199778	no	0	0
160000	no	0	0
25000	yes	0	1
190000	no	0	0
404	yes	0	1
400	no	0	0
7	yes	1	1
9000	yes	0	1
25000	no	0	0
13248	no	0	0
146000	no	0	0
1600	no	0	0
114447	yes	0	1
140000	yes	0	1
9000	yes	0	1
75000	yes	0	1
34564	yes	0	1
4428	yes	0	1
2435	no	0	0
4	yes	0	1
600	yes	0	1
78000	no	1	0
2944	no	0	0
5500	no	0	0
11705	yes	0	1
65000	no	0	0
5000	yes	0	1
3800	yes	0	1
8000	yes	0	1
28750	no	0	0
3772	no	0	0
206392	no	0	0
34000	yes	0	1
1550	yes	0	1
8000	yes	0	1
15500	no	0	0
17000	yes	0	1
35000	yes	0	1
220104	yes	0	1
3172	no	0	0
